# Supplementary material for: De novo assembly of the carrot mitochondrial genome using next generation sequencing of whole genomic DNA provides first evidence of DNA transfer into an angiosperm plastid genome
Source: PubMed Central journal article supplement (PMC3413510; doi:10.1186/1471-2229-12-61), 2012-05-01
Supplement: 1471-2229-12-61-S2.pdf [file 1471-2229-12-61-S2.pdf]

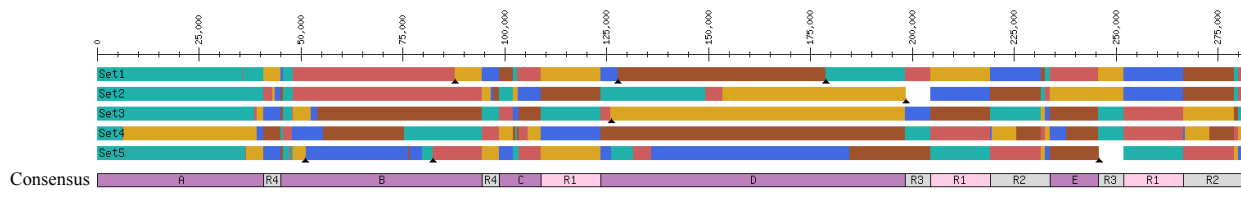

**Figure S2.** Comparison of the five mitochondrial genome assemblies from sequence sets 1-5. Different colors identify different contigs. Triangles indicate missing connections between contigs. Letters in the consensus sequence indicate single copy regions (A-E) and repeated regions (R1-R4).
