# Supplementary material for: De novo assembly of the carrot mitochondrial genome using next generation sequencing of whole genomic DNA provides first evidence of DNA transfer into an angiosperm plastid genome
Source: PubMed Central journal article supplement (PMC3413510; doi:10.1186/1471-2229-12-61), 2012-05-01
Supplement: 1471-2229-12-61-S4.pdf [file 1471-2229-12-61-S4.pdf]

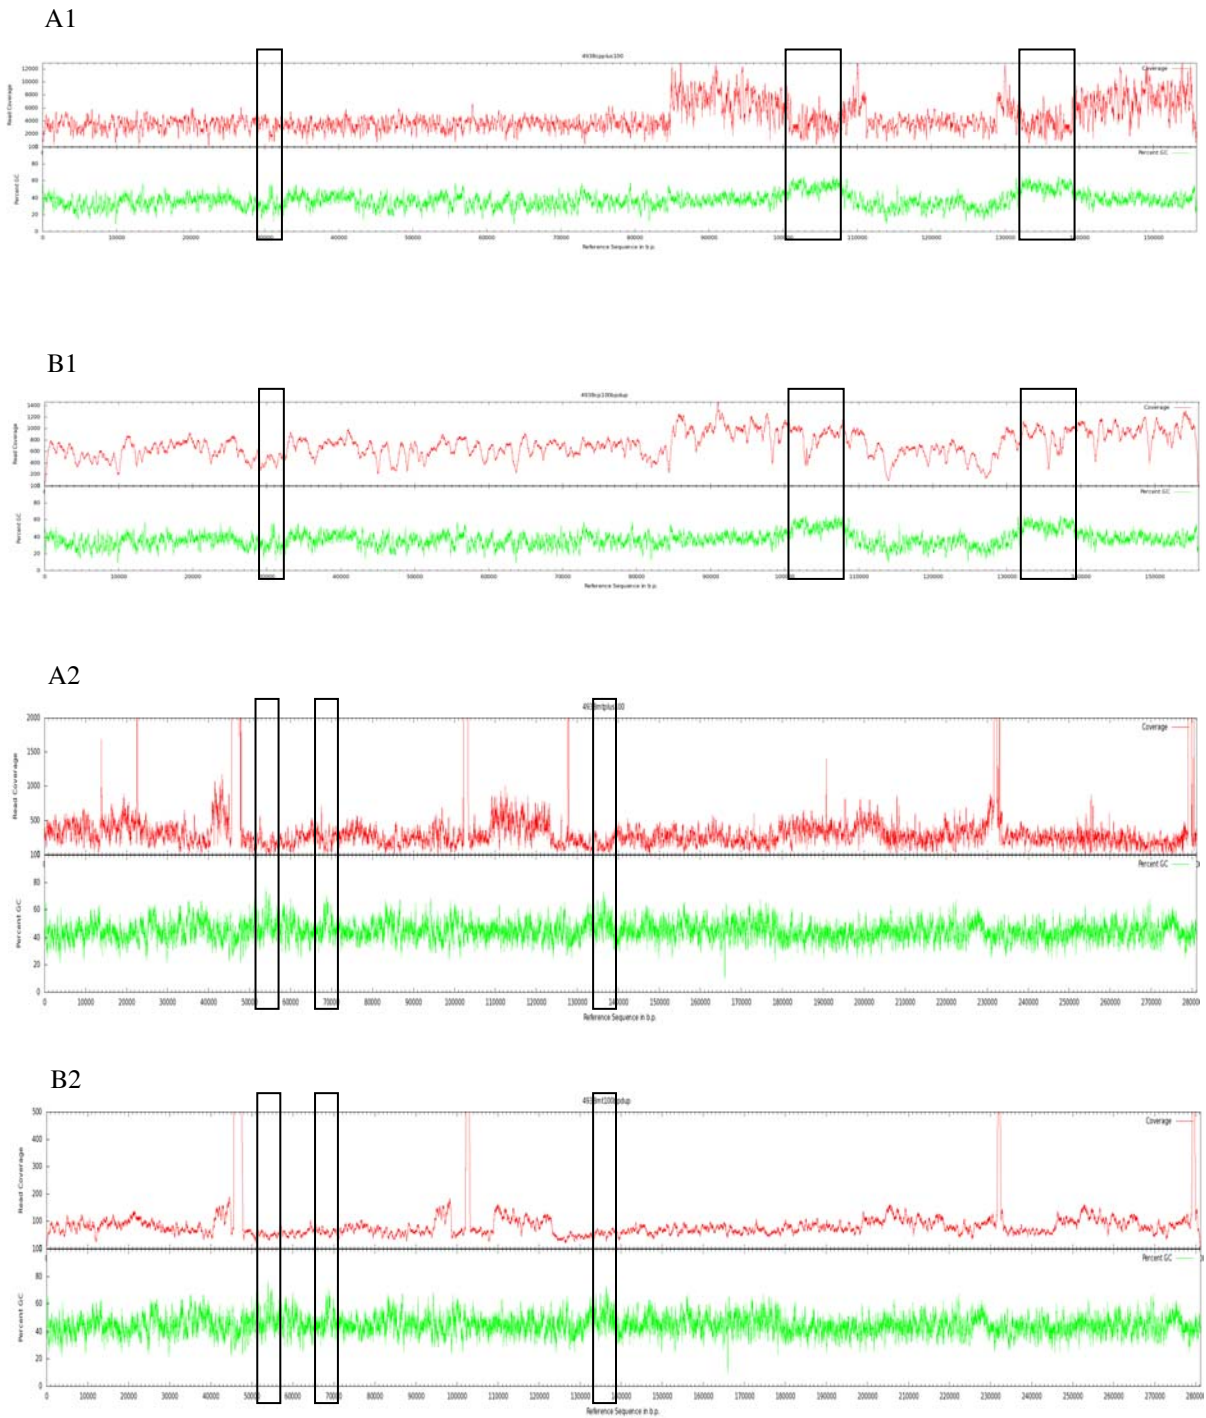

**Figure S3.** Representative line graph displaying the Illumina (A) and 454 (B) reads coverage (Red line) and GC contents (Green line) across the complete plastid genome (A1-B1) and mitochondrial (A2-B2). Windows in the graph indicate region with higher GC content.
