# Supplementary material for: De novo assembly of the carrot mitochondrial genome using next generation sequencing of whole genomic DNA provides first evidence of DNA transfer into an angiosperm plastid genome
Source: PubMed Central journal article supplement (PMC3413510; doi:10.1186/1471-2229-12-61), 2012-05-01

**Figure S4.** Original Southern blot pictures for repeat 1-3-4.

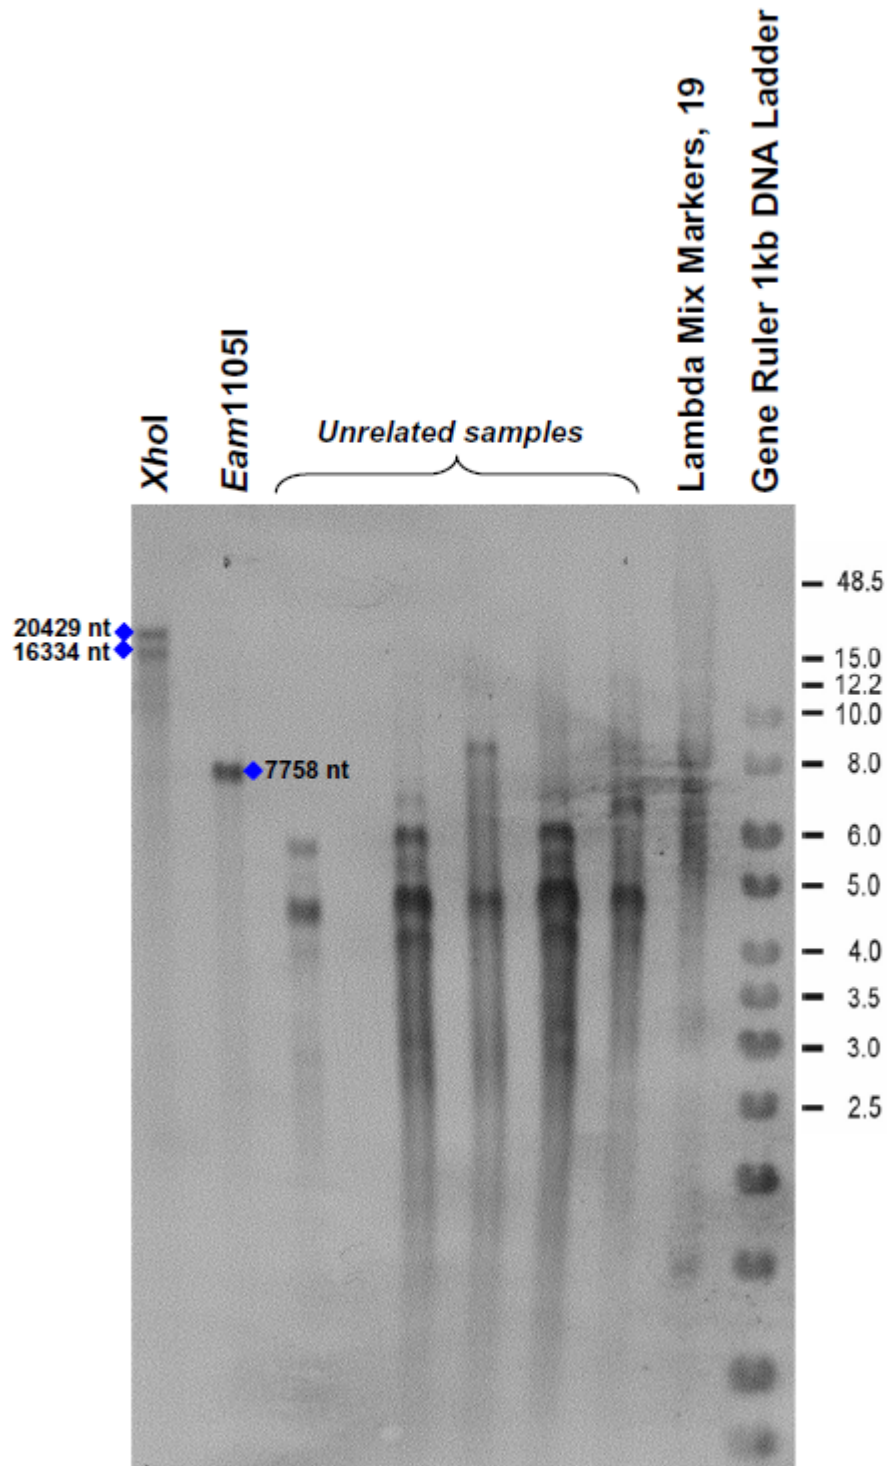

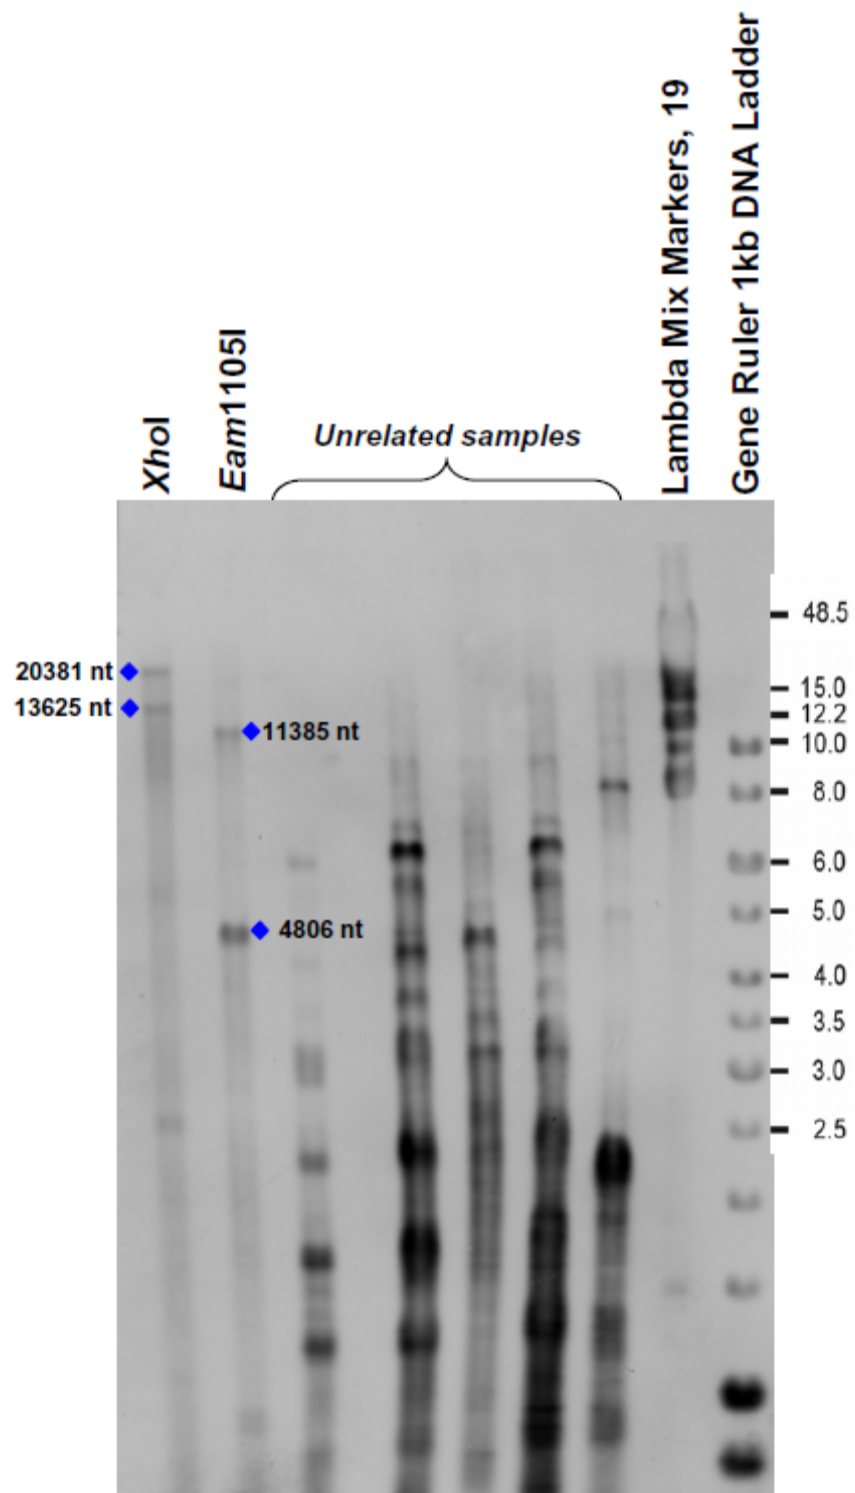

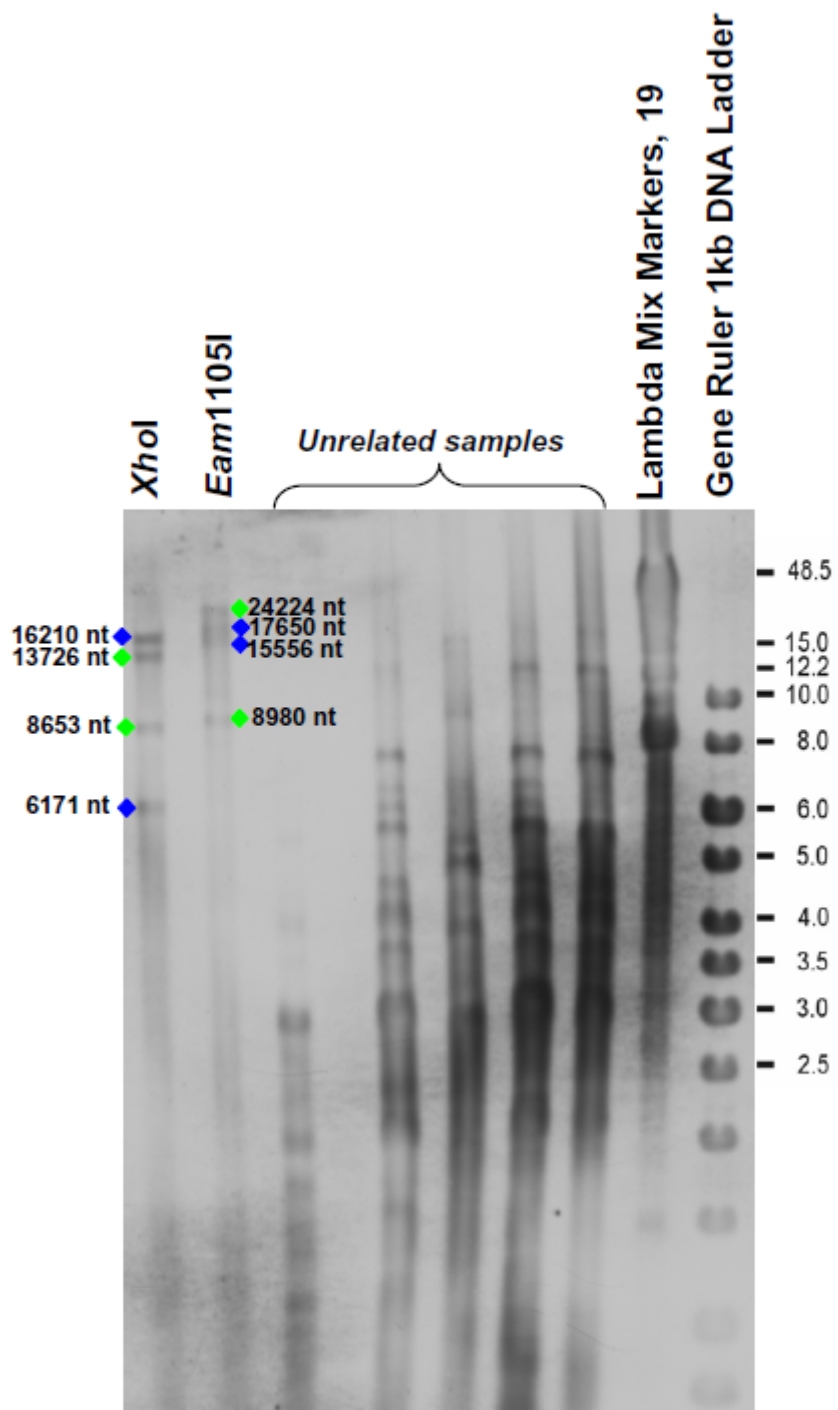

Supplement: 1471-2229-12-61-S5.pdf [file 1471-2229-12-61-S5.pdf]
