# Supplementary material for: De novo assembly of the carrot mitochondrial genome using next generation sequencing of whole genomic DNA provides first evidence of DNA transfer into an angiosperm plastid genome
Source: PubMed Central journal article supplement (PMC3413510; doi:10.1186/1471-2229-12-61), 2012-05-01
Supplement: 1471-2229-12-61-S7.pdf [file 1471-2229-12-61-S7.pdf]

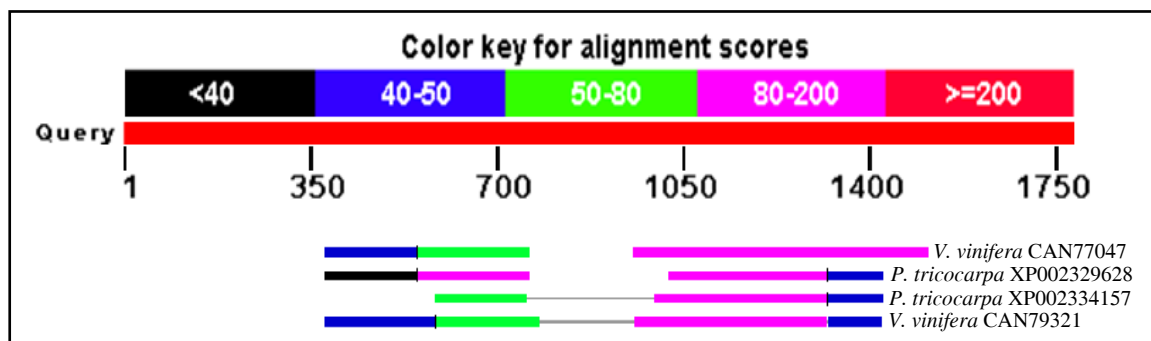

**Figure S5.** Results of alignment of the *DcMP 3* sequence against the NCBI protein database.
