# Supplementary material for: De novo assembly of the carrot mitochondrial genome using next generation sequencing of whole genomic DNA provides first evidence of DNA transfer into an angiosperm plastid genome
Source: PubMed Central journal article supplement (PMC3413510; doi:10.1186/1471-2229-12-61), 2012-05-01
Supplement: 1471-2229-12-61-S8.pdf [file 1471-2229-12-61-S8.pdf]

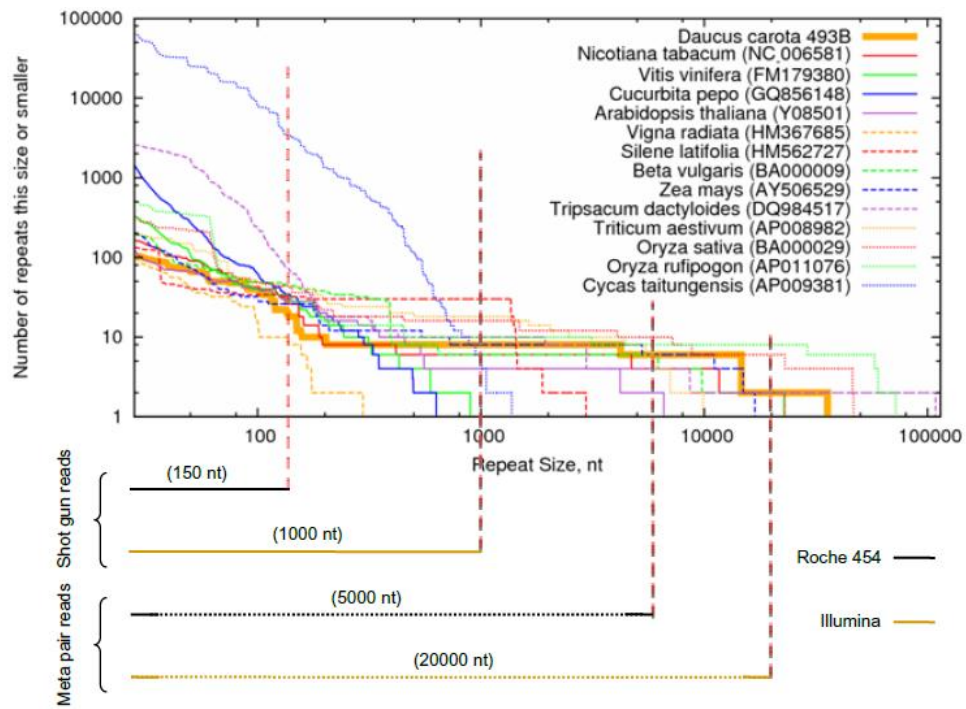

**Figure S6.** Potentiality of next generation sequencing data for assembly of plant mitochondrial genomes. Number and size of repeat regions among representative sequenced plant mitochondrial genomes compared to the longest read length available for the two most utilized next generation sequencing technologies.
