# Supplementary material for: De novo assembly of the carrot mitochondrial genome using next generation sequencing of whole genomic DNA provides first evidence of DNA transfer into an angiosperm plastid genome
Source: PubMed Central journal article supplement (PMC3413510; doi:10.1186/1471-2229-12-61), 2012-05-01
Supplement: 1471-2229-12-61-S9.pdf [file 1471-2229-12-61-S9.pdf]

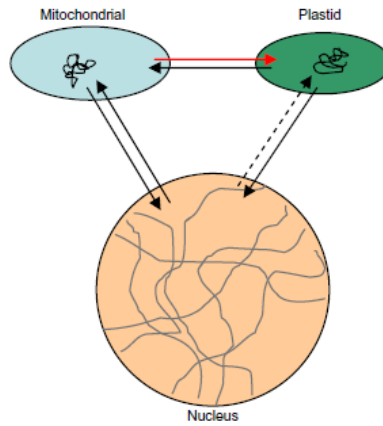

**Figure S7. Intercompartmental DNA transfer.** Schematic representation of all possible and observed directions of intercompartmental DNA transfer in angiosperm genomes. Black solid arrows indicate previously observed DNA transfers; black dotted arrow indicates unobserved DNA transfer; Red solid arrow indicates the mitochondrial-to-plastid transfer identified in carrot.
